# Supplementary material
Source: publisher figshare collection journal article supplement (https://acs.figshare.com/ndownloader/files/12272912)
Supplement: Supplementary file 1 [file 12272912]

# Electrochemical Synthesis of Mesoporous Au-Cu Alloy Films with Vertically Oriented Mesochannels Using Block Copolymer Micelles

Asep Sugih Nugraha<sup>1,2,3</sup>, Victor Malgras<sup>\*2</sup>, Muhammad Iqbal<sup>2,3</sup>, Bo Jiang<sup>2</sup>, Cuiling Li<sup>2</sup>, Yoshio Bando<sup>2,4</sup>, Abdulmohsen Alshehri<sup>5</sup>, Jeonghun Kim<sup>1,6</sup>, Yusuke Yamauchi<sup>1,6,7\*</sup> and Toru Asahi<sup>3\*</sup>

- 1 College of Chemistry and Molecular Engineering, Qingdao University of Science and Technology, Qingdao 266042, China
- 2 International Center for Materials Nanoarchitectonics (WPI-MANA) & International Center for Young Scientists (ICYS), National Institute for Materials Science (NIMS), 1-1 Namiki, Tsukuba, Ibaraki 305-0044, Japan
- 3 Faculty of Science and Engineering, Waseda University, 3-4-1 Okubo, Shinjuku, Tokyo 169-8555, Japan.
- 4 Australian Institute for Innovative Materials (AIIM), University of Wollongong, Squires Way, North Wollongong, New South Wales 2500, Australia
- 5 Department of Chemistry, King Abdulaziz University, P.O. Box 80203, Jeddah 21589, Saudi Arabia
- 6 School of Chemical Engineering & Australian Institute for Bioengineering and Nanotechnology (AIBN), The University of Queensland, Brisbane, QLD 4072, Australia
- 7 Department of Plant & Environmental New Resources, Kyung Hee University, 1732 Deogyong-daero, Giheunggu, Yongin-si, Gyeonggi-do 446-701, South Korea

E-mails: [MALGRAS.Victor@nims.go.jp](mailto:MALGRAS.Victor@nims.go.jp); [y.yamauchi@uq.edu.au](mailto:y.yamauchi@uq.edu.au); [tasahi@waseda.jp](mailto:tasahi@waseda.jp)

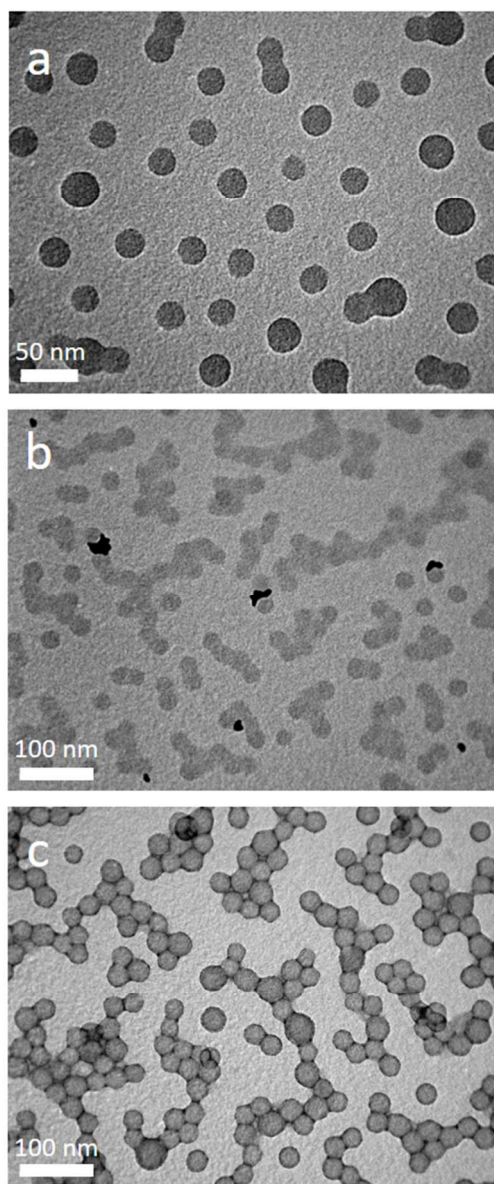

**Figure S1** TEM images of polymeric micelles with various Au:Cu molar ratios ((a) 100:0, (b) 25:75, and (c) 0:100).

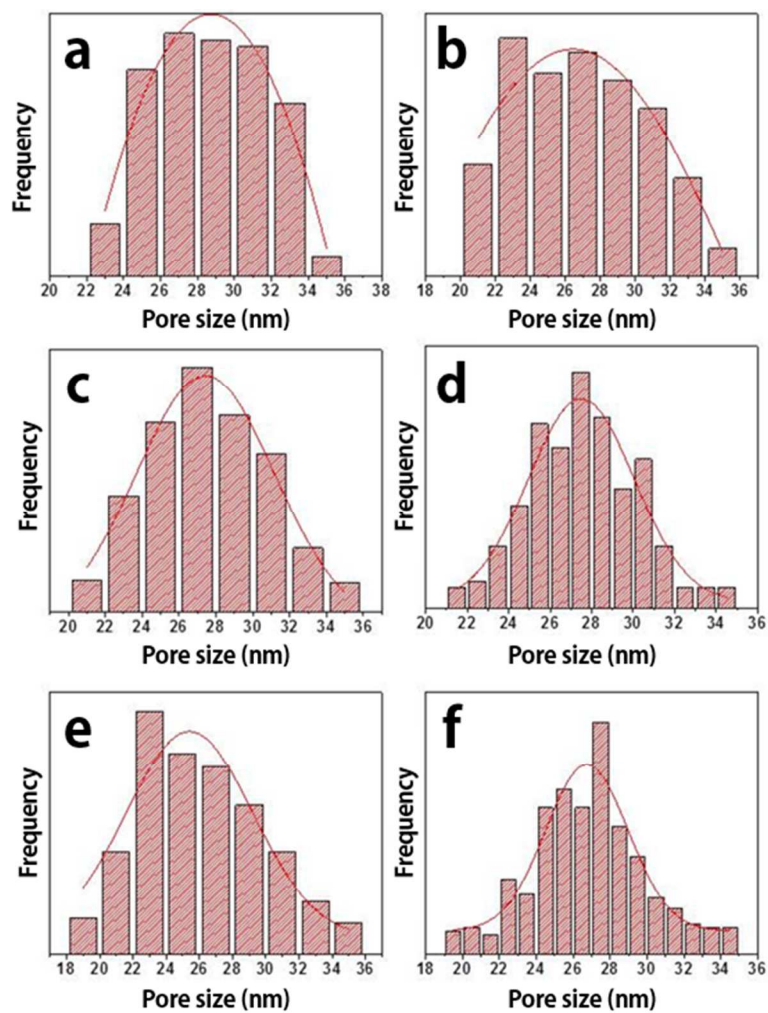

**Figure S2** Pore size distribution of the mesoporous (a)  $\text{Au}_{100}$ , (b)  $\text{Au}_{94}\text{Cu}_6$ , (c)  $\text{Au}_{87}\text{Cu}_{13}$ , (d)  $\text{Au}_{78}\text{Cu}_{22}$ , (e)  $\text{Au}_{49}\text{Cu}_{51}$ , and (f)  $\text{Au}_{41}\text{Cu}_{59}$  films.

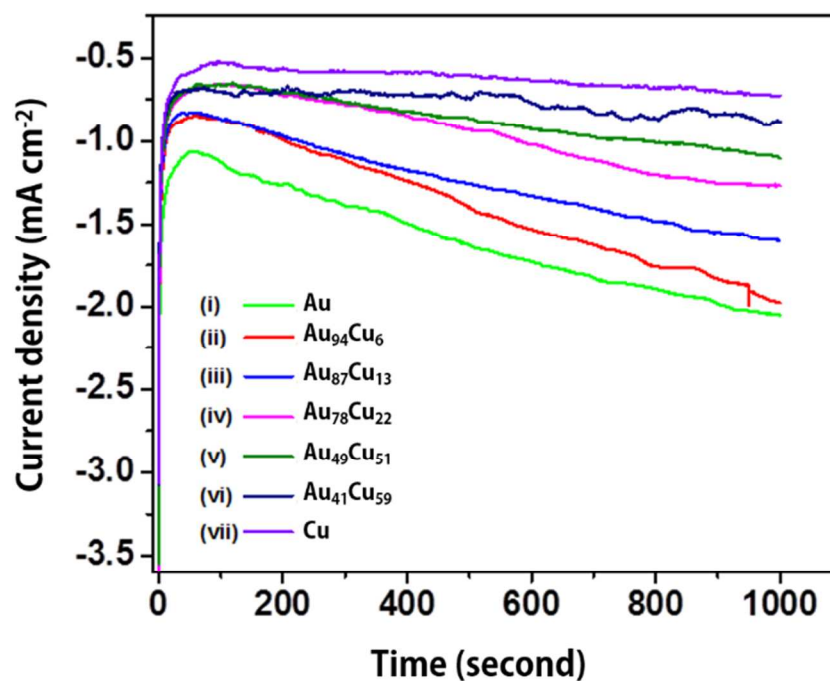

**Figure S3** Amperometric plots for the deposition of mesoporous Au-Cu films with different compositions. Each process is carried out at room temperature at  $-0.5 \text{ V}$  (vs.  $\text{Ag/AgCl}$ ) for 1000 s. The current density was normalized by the geometrical electrode area.

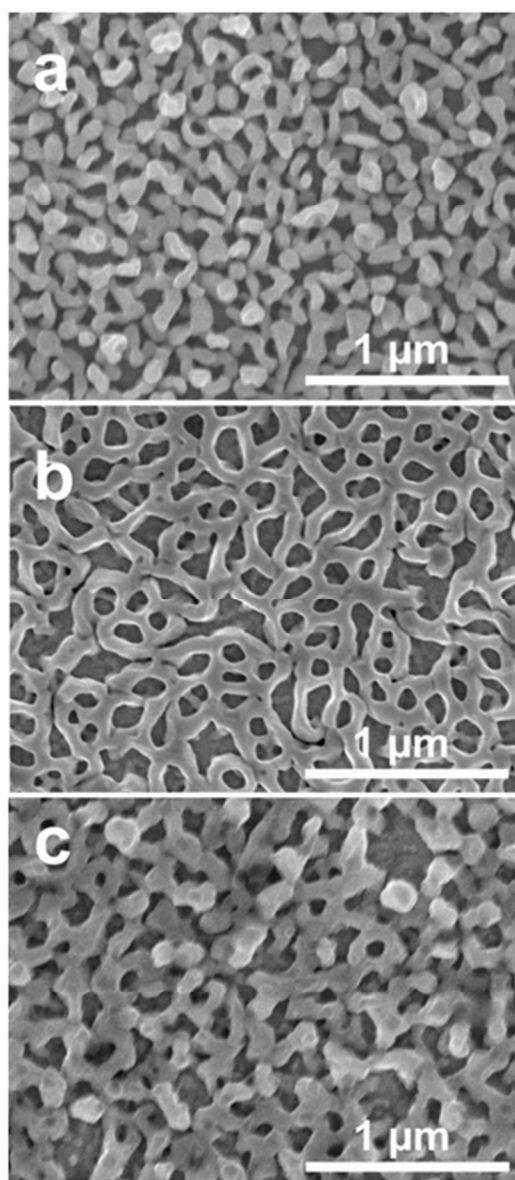

**Figure S4** Typical SEM images of the obtained Cu films for 1000 s deposition and at various deposition potentials of (a) -0.5 V, (b) -0.4 V, (c) -0.35 V.

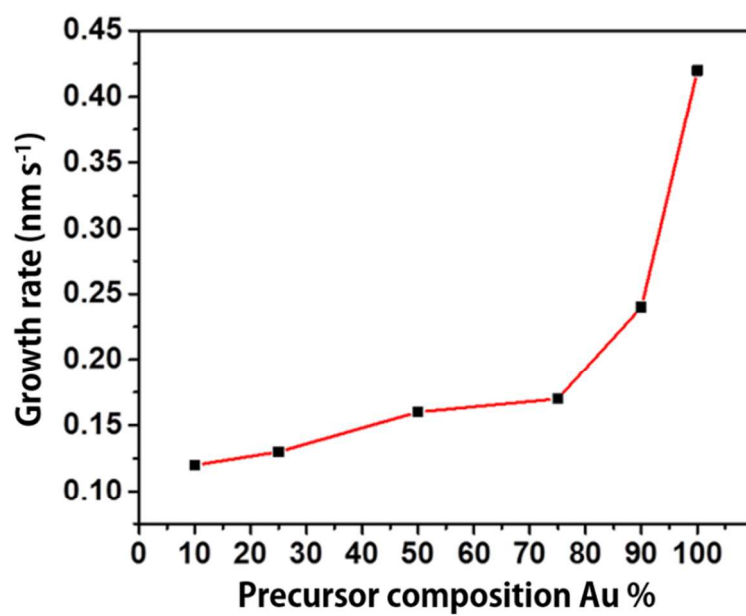

**Figure S5** Relationship between film growth rate and precursor composition.

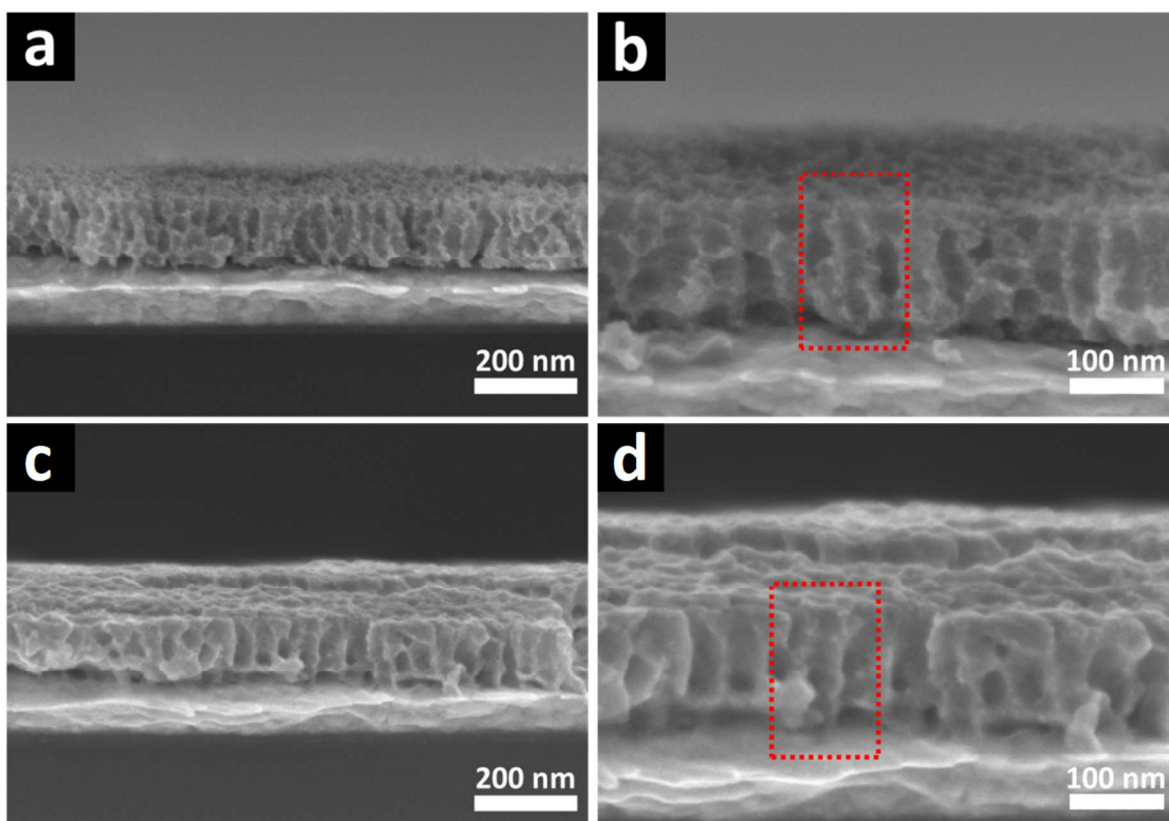

**Figure S6** Cross-sectional SEM images of the mesoporous  $\text{Au}_{78}\text{Cu}_{22}$  film (a) low- (b) high-magnification and the mesoporous  $\text{Au}_{49}\text{Cu}_{51}$  film (c) low- (d) high-magnification.

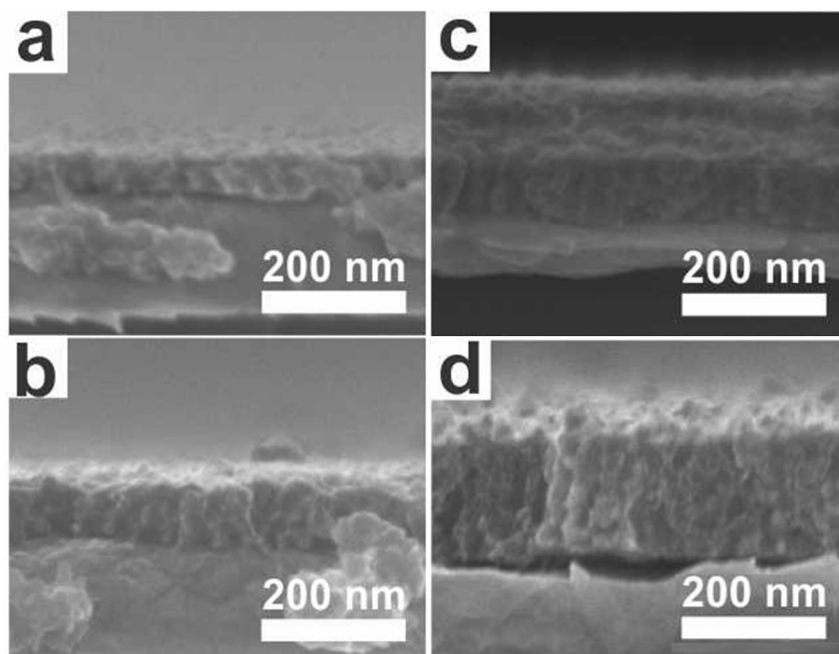

**Figure S7** Cross-sectional SEM images of the mesostructured  $\text{Au}_{49}\text{Cu}_{51}$  films with different reduction times before immersion in THF solution [(a) 500 s, (b) 750 s, (c) 1000 s, (d) 1750 s].



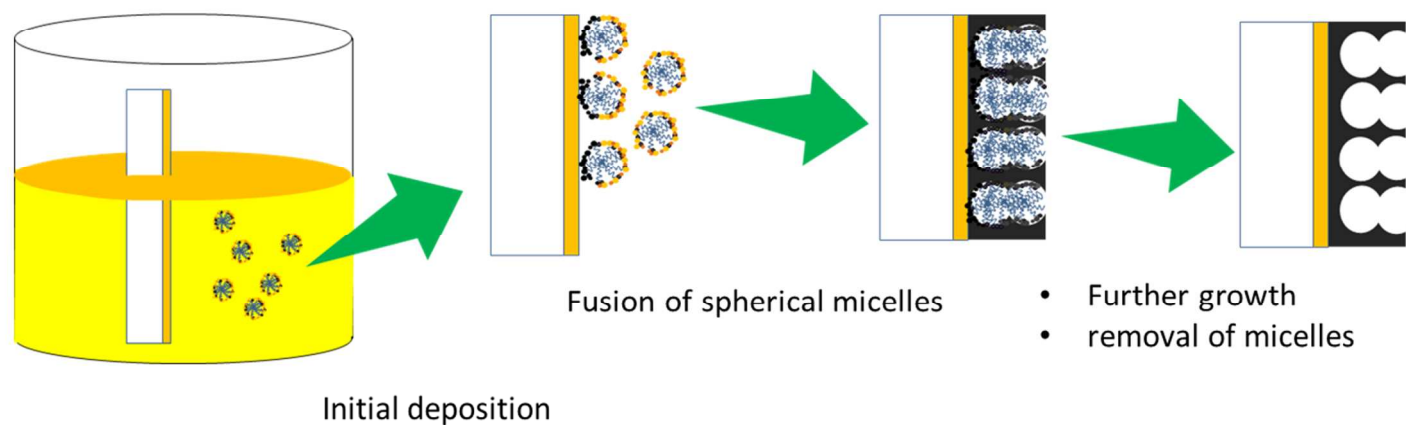

**Figure S8** Schematic illustration of formation of vertically oriented mesochannels through the fusion of the spherical micelles.

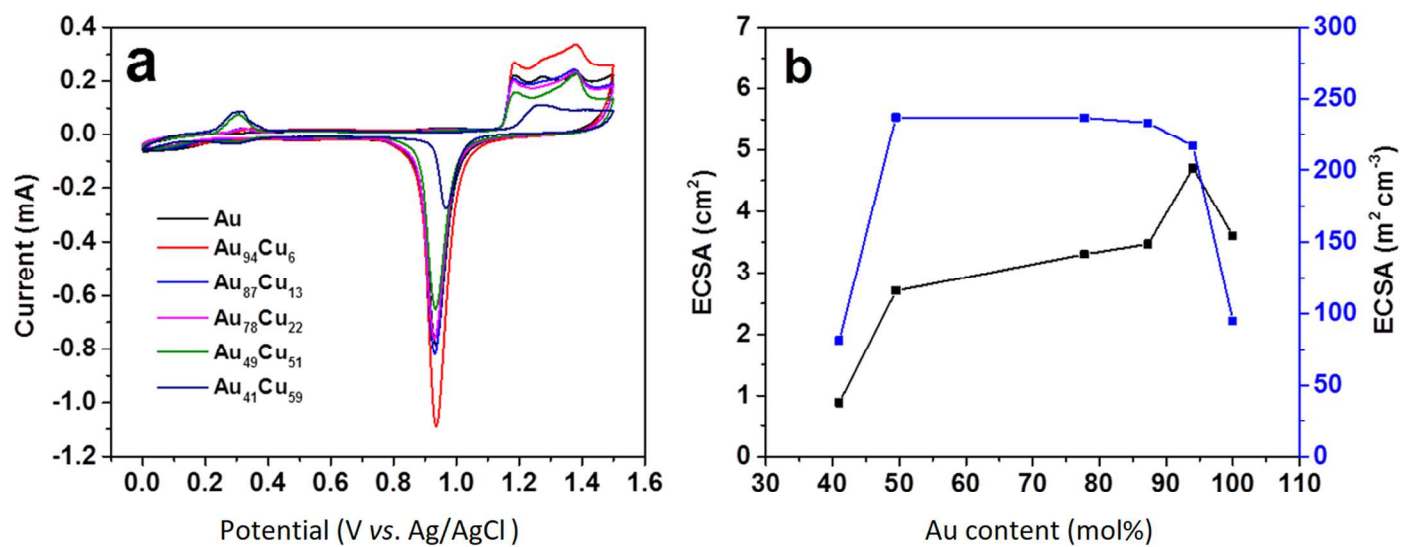

**Figure S9** (a) CV measurements of the mesoporous Au-Cu films with different composition in 0.5 M H<sub>2</sub>SO<sub>4</sub>. (b) Relationship between the composition ratios, ECSA<sub>(Au)</sub> and volume-normalized ECSA<sub>(Au)</sub>.

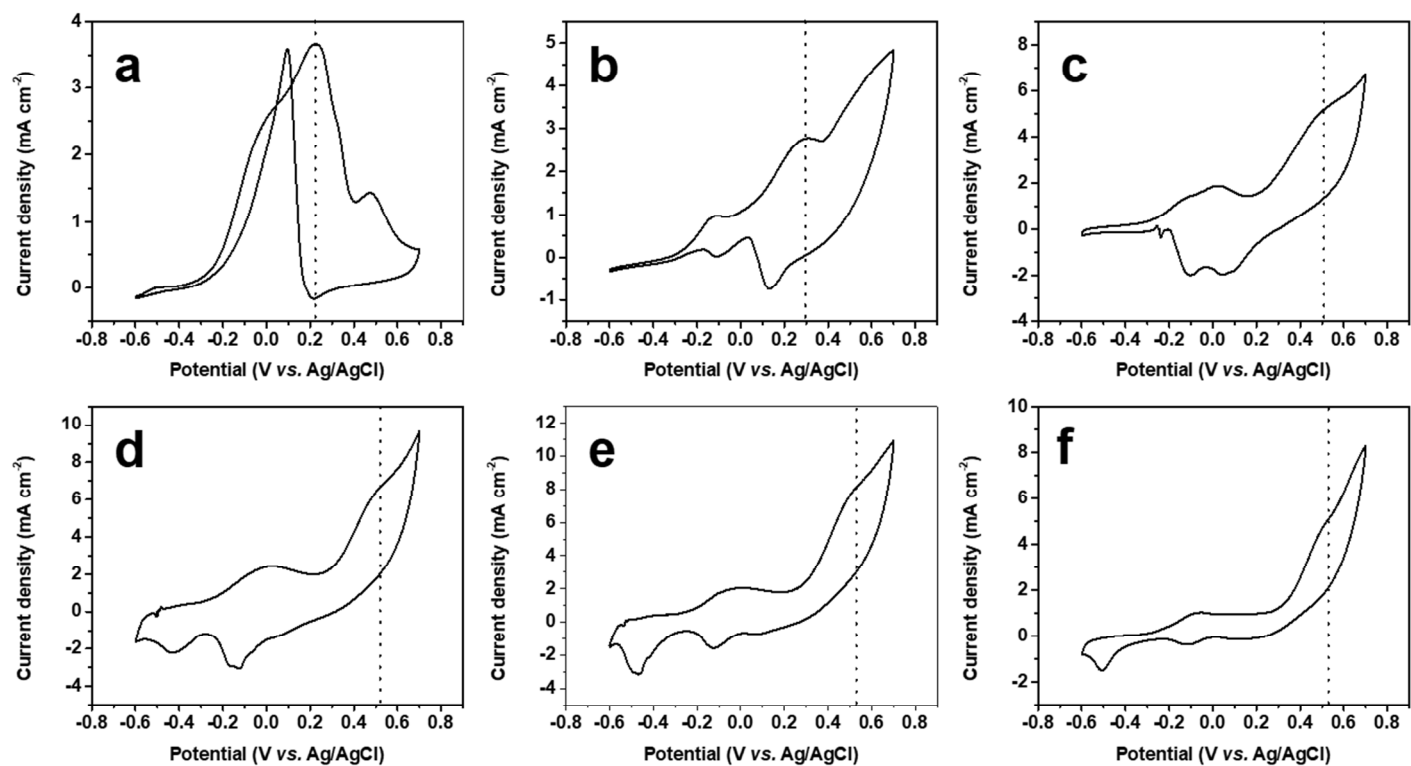

**Figure S10** CVs of the mesoporous (a) Au<sub>100</sub>, (b) Au<sub>94</sub>Cu<sub>6</sub>, (c) Au<sub>87</sub>Cu<sub>13</sub>, (d) Au<sub>78</sub>Cu<sub>22</sub>, (e) Au<sub>49</sub>Cu<sub>51</sub>, and (f) Au<sub>41</sub>Cu<sub>59</sub> films. The current density was normalized by the geometrical electrode area. The glucose electro-oxidation peaks are highlighted by dot lines.

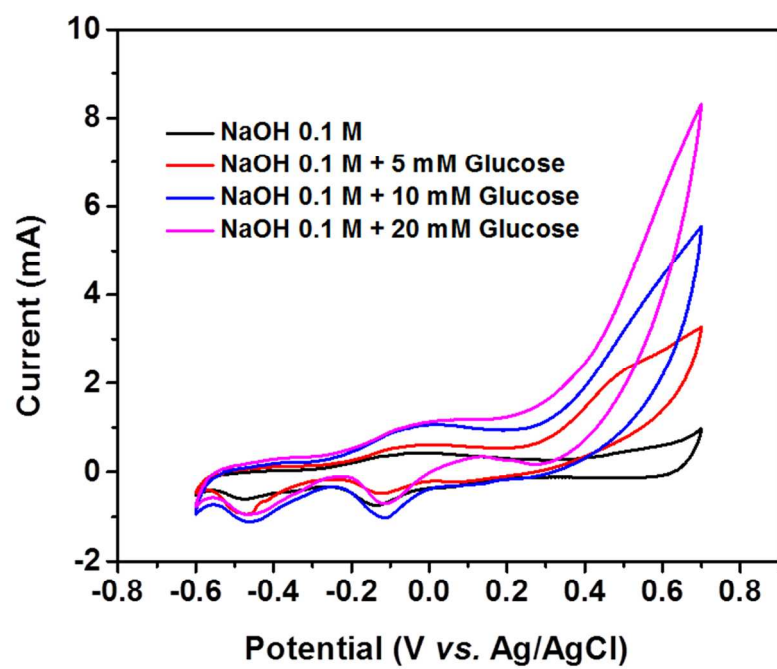

**Figure S11** Cyclic voltammograms of the mesoporous  $\text{Au}_{49}\text{Cu}_{51}$  in different concentrations of glucose. The scan rate is  $50 \text{ mV s}^{-1}$ .

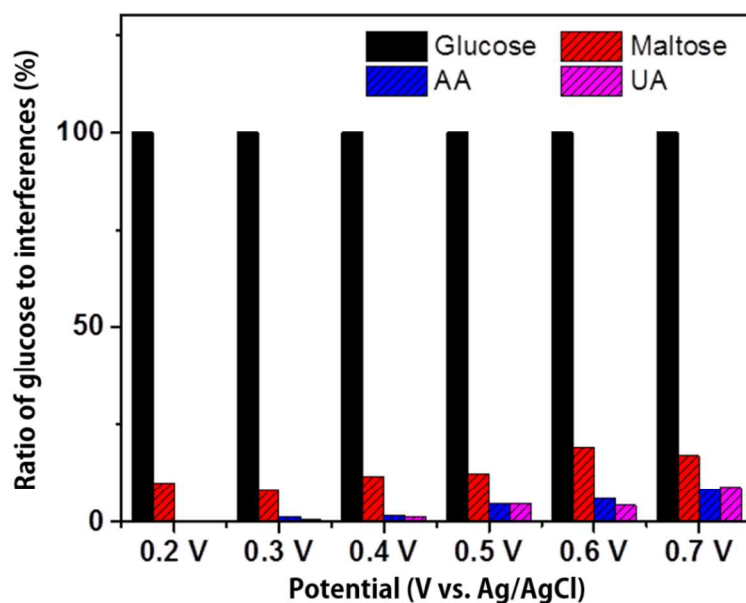

**Figure S12** Effect of different applied potential on the amperometric response of mesoporous  $\text{Au}_{49}\text{Cu}_{51}$  to glucose, ascorbic acid, uric acid, maltose in 0.1 M NaOH. The current density of glucose was taken as 100% and the current densities for interfering electroactive species were normalized by the current of glucose.

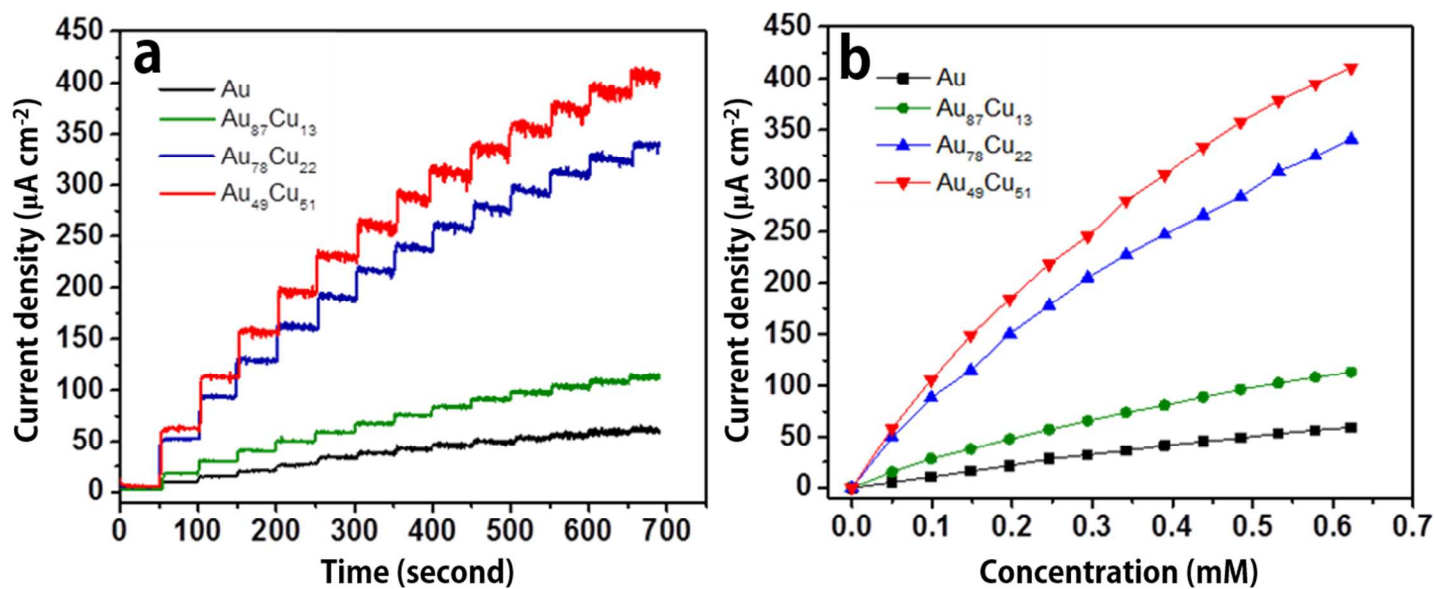

**Figure S13** (a) Time dependent amperometry following successive the addition of glucose (0.05 mM) with the mesoporous films in 0.1 M NaOH at 0.3 V (vs. Ag/AgCl). (b) Corresponding calibration curves. The current response of the dynamic detection of glucose was normalized by the geometrical electrode area.

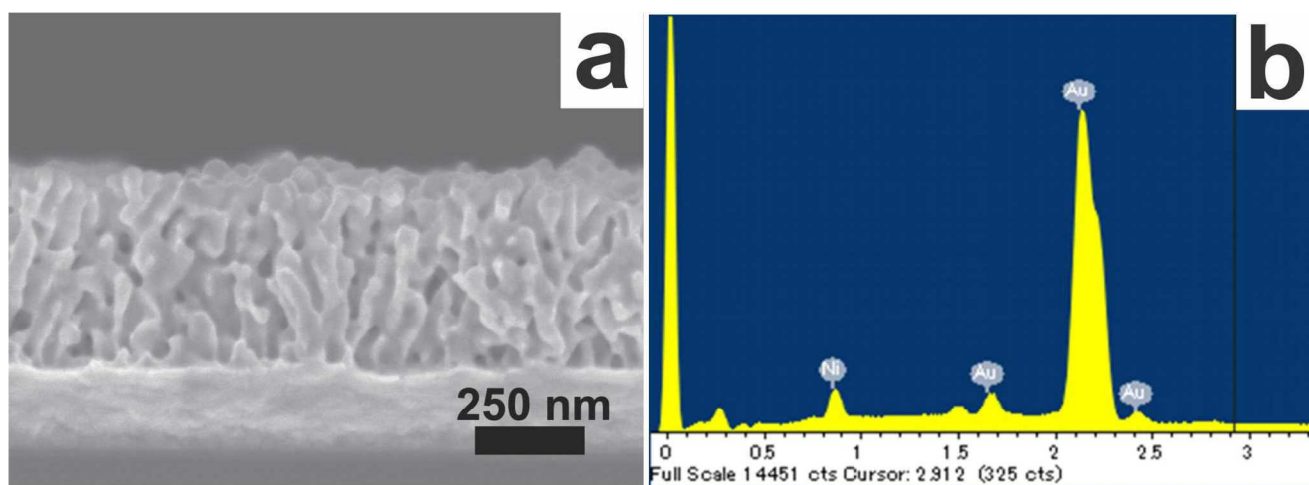

**Figure S14** (a) Cross-sectional SEM images of the mesoporous Au-Ni film from the electrolyte solution with the compositional ratio of Au (75) : Ni (25). (b) Corresponding EDX spectra of the mesoporous Au-Ni film.
